# Supplementary material for: DNA Interaction Studies of Selected Polyamine Conjugates
Source: PubMed Central journal article supplement (PMC5037830; doi:10.3390/ijms17091560), 2016-09-19
Supplement: ijms-17-01560-s001.pdf [file ijms-17-01560-s001.pdf]

## Supplementary Materials: DNA Interaction Studies of Selected Polyamine Conjugates

Marta Szumilak, Anna Merecz, Malgorzata Strek, Andrzej Stanczak, Tadeusz W. Inglot and Boleslaw T. Karwowski

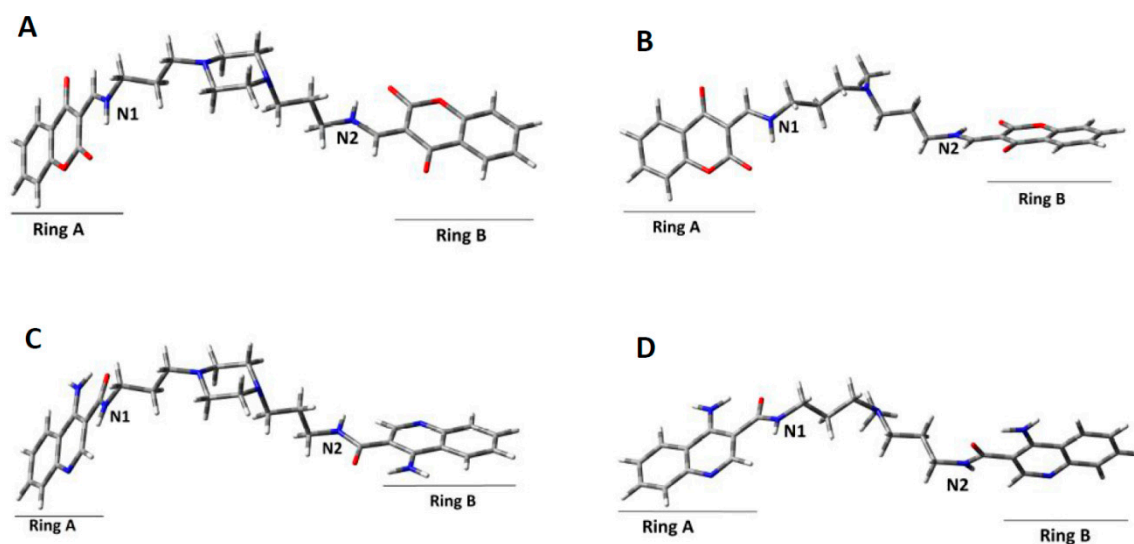

**Figure S1.** Spatial geometries of compounds: **1a** (A), **1b** (B), **2a** (C), **2b** (D). The structures have been optimized at the B3LYP/6-31G level of theory in the gaseous phase.

**Table S1.** The distances between terminal nitrogen atoms (N1 and N2) and charge distribution over aromatic rings (Ring A and B) in examined compounds obtained by calculation at the B3LYP/6-31G level of theory in the gaseous phase.

| Compound  | N1-N2 Distance in (Å) | Charge Distribution |         |
|-----------|-----------------------|---------------------|---------|
|           |                       | Ring A              | Ring B  |
| <b>1a</b> | 10.939                | -0.6465             | -0.6336 |
| <b>1b</b> | 9.271                 | -0.6419             | -0.6366 |
| <b>2a</b> | 11.033                | -0.1899             | 0.5998  |
| <b>2b</b> | 9.306                 | -0.1692             | 0.6179  |

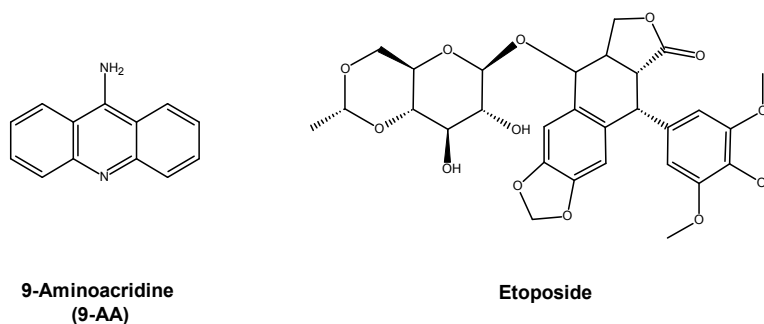

**Figure S2.** Chemical structure of reference compounds.

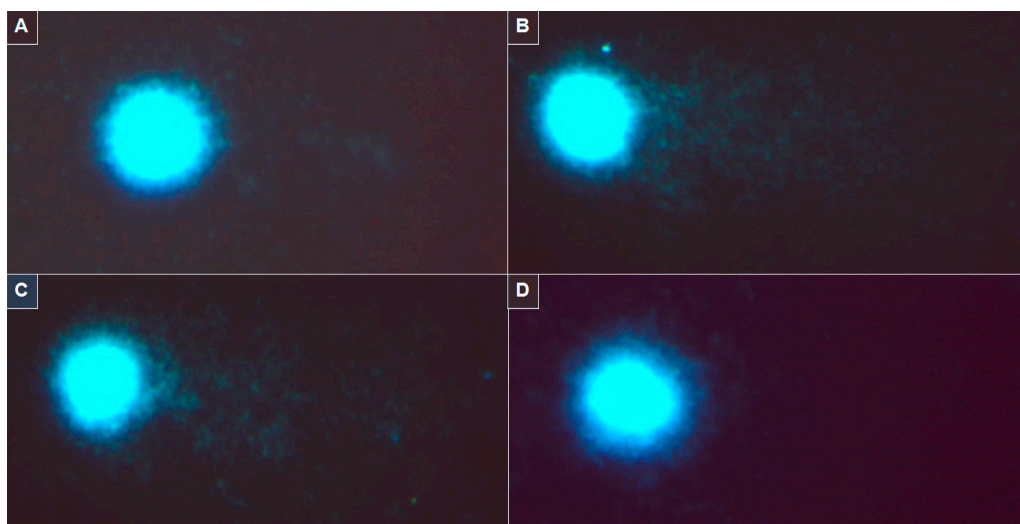

**Figure S3.** The representative pictures of comet assay. MOLT-4 comets from cells (control without H<sub>2</sub>O<sub>2</sub> (A)) exposed to **2a** at the concentration of 5 μM (B), 10 μM (C) and 15 μM (D) after prior incubation with H<sub>2</sub>O<sub>2</sub>.
